# Supplementary material for: Digitally-enhanced dog behavioral testing
Source: PubMed Central journal article supplement (PMC10692085; doi:10.1038/s41598-023-48423-8), 2023-12-01
Supplement: 41598_2023_48423_MOESM1_ESM.pdf [file 41598_2023_48423_MOESM1_ESM.pdf]

# Appendix 1

Participants breed, gender and age in years at time of test.

| Dog ID | Race or mixed breed        | Gender | Dog age (years) |
|--------|----------------------------|--------|-----------------|
| D001   | Cattle dog                 | M      | 2.0             |
| D002   | Kooiker (Dutch Spaniel)    | F      | 1.8             |
| D003   | Border Collie              | M      | 1.8             |
| D004   | Border Collie              | F      | 1.7             |
| D005   | Border Collie              | F      | 1.7             |
| D006   | Dalmatian                  | M      | 1.5             |
| D007   | English Bulldog            | F      | 1.4             |
| D008   | Old German Herding Dog     | F      | 1.4             |
| D009   | Pug                        | F      | 1.4             |
| D010   | Border Collie              | M      | 1.3             |
| D011   | Border Collie              | F      | 1.3             |
| D012   | Border Collie              | M      | 1.3             |
| D036   | Labrador Retriever (Blond) | F      | 1.8             |
| D037   | Labrador Retriever         | F      | 1.8             |
| D038   | Golden Retriever           | M      | 1.5             |
| D039   | Labrador Retriever         | M      | 1.5             |
| D040   | Golden Retriever           | M      | 1.6             |
| D041   | English Cocker Spaniel     | M      | 0.9             |
| D052   | Labrador Retriever         | M      | 1.4             |
| D054   | Labrador Retriever         | F      | 1.4             |
| D055   | Labrador Retriever         | F      | 1.4             |
| D056   | Labrador Retriever         | F      | 1.4             |
| D058   | Labrador Retriever         | F      | 1.4             |
| D059   | Labrador Retriever         | F      | 1.1             |
| D061   | Labrador Retriever         | F      | 1.0             |
| D062   | Labrador Retriever         | M      | 1.0             |
| D064   | Labrador Retriever         | F      | 1.0             |
| D065   | Labrador Retriever         | F      | 0.9             |
| D067   | Labrador Retriever         | F      | 1.1             |
| D074   | Dachshund                  | F      | 0.9             |
| D081   | Jack Russell               | M      | 1.0             |
| D088   | Border Collie              | M      | 1.7             |

|      |                                |   |     |
|------|--------------------------------|---|-----|
| D099 | Mixed Breed                    | F | 1.4 |
| D100 | Shetland Sheepdog              | F | 1.0 |
| D103 | Bernese Mountain Dog           | F | 1.8 |
| D104 | White Swiss Shepherd Dog       | M | 1.5 |
| D105 | Golden Retriever               | F | 1.3 |
| D106 | Toy Poodle                     | F | 1.8 |
| D107 | American Staffordshire Terrier | F | 1.5 |
| D114 | English Cocker Spaniel         | F | 1.0 |
| D115 | Australian Shepherd            | M | 1.1 |
| D118 | Labrador Retriever             | F | 1.0 |
| D119 | Labrador Retriever             | M | 0.9 |
| D120 | Labrador Retriever             | F | 0.9 |
| D121 | Labrador Retriever             | F | 0.9 |
| D122 | Labrador Retriever             | M | 1.1 |
| D123 | Labrador Retriever             | M | 1.0 |
| D125 | Labrador Retriever             | F | 1.0 |
| D126 | Labrador Retriever             | F | 1.0 |
